# Supplementary material for: Evidence for the evolutionary steps leading to mecA-mediated β-lactam resistance in staphylococci
Source: PLoS Genet. 2017 Apr 10;13(4):e1006674. doi: 10.1371/journal.pgen.1006674 (PMC5402963; doi:10.1371/journal.pgen.1006674)
Supplement: S2 Table — (XLSX) [file pgen.1006674.s002.xlsx]

## Sheet: Sheet1
S2 Table - Percentage of nucleotide identity and size of the core genes of the 76 S. Sciuri isolates from this study.
#Gene	%Ident	bp
abgB_2	90.2	1188
abgT_2	88.9	1536
abrB	97.1	276
accB_1	84	420
accB_2	93.8	450
accC_1	87.3	1341
accC_2	92.5	1359
accD	94.5	900
acdA	90.8	1206
ackA	92.6	1197
acnA	93.8	2709
acoD	92.6	1521
acpP	98.7	234
acpS	89.3	363
acsA_2	92.9	1713
acuA	90.1	636
acuC	90.3	1146
acyP	90.4	270
adaB_1	86.3	519
addA	89.1	3673
addB	88.5	3480
adk	97.2	648
adrA	95.4	1071
aes	90.6	1035
agrA	90.9	717
agrB	95	576
albF	87.8	1290
ald2	92.8	1113
alkA	86.2	900
alkH	89.2	1412
alr2	87.4	1071
alsT_1	89.5	1374
alsT_2	90.2	1563
ansA	89.9	969
apt	92.9	519
arcB	91.2	1002
arg	90.2	906
argB	89.4	762
argC	92.8	1075
argG	92.4	1203
argH1	89.9	1374
argJ	90.7	1250
argO	87.4	612
argR	92.3	453
argS	94	1662
arlR	90.8	675
arlS	89	1377
aroA	90.5	1344
aroB	92.2	1074
aroC	93.7	1167
aroD	90.2	738
aroE	87.4	819
aroF	95.6	1080
aroK	93.3	489
arsB_2	85	1296
artM	94.4	726
artQ	94	1464
asnS	94.4	1293
aspS	90.6	1773
atl_1	92.4	786
atl_4	94.3	970
atpA	95.8	1537
atpB	97	723
atpC	98	405
atpD	96.3	1416
atpE	99.5	219
atpF	97.5	525
atpG	95.1	870
atpH	96.3	540
azo1	93.8	579
azoR2	94	636
bceA	90	762
bcp	92.4	459
bdbC	92	414
bdbD	92.9	733
betA	91.9	1683
betL	91.2	1606
bfmBAA	89.9	999
bfmBAB	91.3	984
bglA_1	88.5	1443
bglK	85.1	871
bioY	91.5	552
bltD	92.4	858
bmr3	89.1	1341
bmrA	88.5	1722
bmrR	88.1	816
brnQ_1	88.9	1356
brnQ_2	90.8	1338
btuF	89.7	912
caaD	93.2	354
carA	93.2	1101
carB	91.7	3174
catD	89.1	789
catE	88.5	786
cbaA	90.4	1653
cbaB	92.3	480
cca	87.4	1212
cccA_1	97.7	354
cccA_2	96.3	789
ccpA_4	93.9	990
ccpB	87.8	966
ccpN	93.4	648
ccpN_1	90.4	645
ccsA_1	95.2	834
ccsA_2	93.3	1218
ccsB	91.4	1644
cdd	93.8	405
cdr	87.7	1332
cfiB	91.2	3447
cggR	95.9	1017
cidA_1	91.1	399
cidA_2	87.9	387
cidB_1	90	690
cidB_2	86.4	684
cimH	90.1	1344
cinA	88.4	1149
citN_2	90.7	1362
citT	90.9	1518
citZ	94.4	1119
clpB	93	2598
clpC	94.1	2463
clpP_1	95.6	591
clpP_2	90.8	567
clpX	94.6	1263
cmk	93.1	654
coaA	91.6	903
coaD	92.3	495
coaE	84.4	597
coaW	88.2	798
cobT	87.2	1887
codY	93.8	774
comGC	88.1	318
copA	88.2	2385
copZ_2	90.2	204
corA	88.5	945
corC_1	95.4	1347
cpnA	88.8	786
crcB_1	86.5	348
crcB_2	84.4	366
crr	92.7	504
csbB	90.9	930
csbC_2	90	1368
csd	94.2	1242
csoR	89.8	324
cspA	99	201
cspLA	98.5	201
cstA	89.7	1456
ctaA	91	912
ctaB2	94.9	927
ctaC	96.4	1068
ctaD	94.1	1902
ctaE	94.4	630
ctsR	97.8	462
cwlA	89.5	573
cycA_1	92.5	1365
cycA_2	92.3	1356
cycB	90.9	1254
cydD	89.8	1635
cymR_2	96.2	420
cynR	89.9	897
cypC	92.6	1290
cysA	90	600
cysC	91.8	600
cysE	93.6	642
cysH	94.7	732
cysI	91.4	1704
cysJ	89.9	1821
cysK	93.3	930
cysS	93.7	1404
czcD	87	945
czrA	91.3	300
dacA	89.8	1368
dagK	93.9	1005
dapB	88.5	738
dapH	91.2	720
dapL	88.5	1161
davT	92.2	1287
dck	92.5	669
dcuR	88.8	714
dcuS	82.9	1644
ddl	93.9	1074
def	92.8	555
def1	92.4	489
deoB	91	1185
deoC1	93.4	663
deoD	93.2	711
deoR	91.3	939
der_1	90	1101
der_2	91.7	1311
des	90.7	978
desVI	88.8	717
dgk	96.6	615
dgkA	91.4	348
dgoA	87.6	501
dgoD	90	1149
dhaK	93.1	966
dhaL	86.1	576
dhlB	88.7	684
dinB_3	91.1	1260
disA	96.2	807
divIB	90.9	945
divIC	94.5	384
divIVA	96.1	585
dltA	88	1461
dltC	92.8	237
dnaA	94.9	1347
dnaC	93.7	1410
dnaD	92.1	693
dnaG	91.4	1792
dnaJ	92.8	1134
dnaK	95.2	1845
dnaN	94.2	1134
dnaX_1	91.5	1692
dnaX_2	94.6	927
dppE	92.7	1728
dps	97.3	444
dsdA	86.5	1299
dtd	90.9	453
dtpT_1	94.7	1515
dtpT_2	94.3	1503
dxr	91.3	1131
dxs	85.9	1869
eamB_1	85	585
ecfA1	90.2	807
ecfA2_1	89.5	864
ecfT_2	87.8	798
ecsA_2	92.1	738
efp	96.8	558
emrB_1	91.4	1470
emrB_2	91.5	1893
emrK	98.6	648
engB	92.2	588
eno	95	1305
era	93.6	900
erpA	90.6	360
est_1	89.6	690
est_2	95.7	741
exuR	88.5	951
ezrA	93.3	1695
fabD	91.6	921
fabF	93.4	1245
fabG_1	87.6	753
fabG_3	92	738
fabH	93	942
fabI	92.5	774
fabZ	94.1	438
fadA	92.5	1188
fadB	90	747
fadH	89.2	765
fadM	91.1	1005
fadN	92.5	2259
fapR	96.1	570
fas6	93.7	570
fba	96.5	858
fbp	89.7	1956
fda	92.8	891
fdhF	88.6	2361
femA	92.1	1254
femB	91.3	1260
feuB_2	90.7	1005
feuB_3	92.4	972
feuC_1	91.8	1017
feuC_2	92.7	966
ffh	94.7	1374
fgs	91.9	1296
fhs	89.6	1671
fhuD_1	86.2	924
fhuD_2	80.8	987
fhuD_6	95	933
fieF	89.3	858
fmt	92.2	933
fni	91.6	1047
fnr	90.8	693
folA	91.4	486
folA_2	87.9	567
folB	92.2	360
folD	91.1	858
folE2	94.1	879
folK	93	489
folP	88.7	810
frdA	94.1	1764
frdB	94.9	837
frr	96.8	555
fruA_3	91.7	1932
ftnA	96.1	507
ftsA	95.8	1374
ftsH	96.3	2109
ftsK	90.4	2331
ftsL	97.1	381
ftsW	89.2	1200
ftsY	92.9	1173
ftsZ	96.8	1158
fumC	92.7	1389
fur	95.5	441
fusA	96.6	2082
gabD_1	89.1	1380
gabD_2	89.1	1393
gabR_1	88.2	1389
gabR_2	85.5	1386
gapA1	97	1011
gapA2	90.8	1035
garB	84.1	1344
garK	91.4	1122
garR	88.5	876
gatA	94.8	1467
gatB_1	94.5	1428
gatC_1	97.3	300
gbsA	91.1	1491
gcvH	97.4	381
gcvPA	88.8	1344
gcvPB	92.1	1521
gcvT	89.4	1092
gdhB	87.4	1125
gdhI	94.1	786
ghrB_1	88.8	954
ghrB_2	87.4	969
glcB	75.1	2067
glcT	91.9	837
glcU	93.7	858
glmM	91.4	1353
glmS	95.2	1803
glmU	94.8	1359
glnA	94.4	1341
glnR	95.8	357
glpD	93.1	1677
glpK	94	1494
gltA	90.9	4494
gltB_1	93.8	1458
gltB_2	87.9	1671
gltC	90.3	921
gltP	92.2	1278
gltS	92.1	1209
gltT	92.8	1305
gltX	94.6	1455
gluD_1	90	1245
gluD_2	95.9	1245
gluP	87.5	1449
glvR	90.3	750
glyA	96.8	1242
glyQS	94	1433
gmuA	86.2	324
gmuE	87	870
gmuF	92.8	942
gnd	93	1404
gntT_1	92.6	1404
gntT_2	89.9	1362
gph_2	89.9	1116
gpmA	89.3	687
gpmI	95.4	1533
gpsA	89.4	1005
graR	89.3	684
graS	83.8	1062
groL	95	1635
groS	96.5	285
group_1000	88.8	480
group_1004	88	351
group_1008	92.4	462
group_1013	87.9	1167
group_1014	89.2	399
group_1015	87.2	615
group_10155	98.8	330
group_10158	97.8	186
group_10159	98.7	234
group_10168	98.2	381
group_10172	99.4	180
group_10180	96.5	198
group_10183	95.7	186
group_10189	98.5	270
group_10192	96	249
group_10193	98.9	189
group_10194	96.8	375
group_10197	96.4	309
group_1020	90.6	573
group_10205	98.2	552
group_10209	93.4	1188
group_10211	95.9	1068
group_10212	94.5	330
group_10213	98	357
group_10214	94.4	807
group_10220	93.2	1479
group_10238	97.8	225
group_10248	91.8	354
group_10250	94	747
group_10263	91.1	552
group_10264	94	564
group_10268	98.4	321
group_10271	93.8	417
group_10273	96.2	345
group_10288	92.3	1740
group_1029	87.2	648
group_10290	93	687
group_10297	96.2	339
group_10303	91.9	483
group_10306	95.5	714
group_10308	94.1	642
group_1031	96.5	141
group_10315	91.1	684
group_10316	93	1008
group_10318	94.7	1371
group_10319	91.3	987
group_10334	92.8	570
group_10337	93	1059
group_10344	94	837
group_10346	92.5	1311
group_1035	88.1	528
group_10358	93.8	438
group_1036	89.8	723
group_10364	96.6	321
group_10369	89.9	456
group_1037	89.4	444
group_10377	94.5	579
group_10380	93.5	321
group_10392	91.2	909
group_10393	95.3	906
group_10395	94.4	1332
group_10398	99.1	543
group_10404	95.2	939
group_10408	92.1	1299
group_10423	93.1	465
group_10428	93.8	1674
group_10430	97.2	618
group_10441	96.9	321
group_10442	94	333
group_10447	89.2	621
group_10458	95.3	1056
group_1046	90.2	984
group_10460	95.2	996
group_10464	92.3	1446
group_10466	96.6	507
group_10467	92.3	336
group_10473	95	498
group_10476	91.7	792
group_10479	94.7	1095
group_10484	95.5	606
group_10491	98.3	360
group_10493	95.3	912
group_10499	88.6	1005
group_1050	85.4	588
group_10503	92.2	537
group_10505	96.4	249
group_10509	98.5	264
group_10515	95.8	216
group_10516	89.1	1053
group_10521	94.4	231
group_10523	97	300
group_10524	88.4	1092
group_10527	94.2	1530
group_10531	90.2	1170
group_10537	93.7	1431
group_10540	89.1	468
group_10542	97.4	267
group_10543	93.8	519
group_10544	98.2	276
group_10547	92.8	525
group_10548	89.2	204
group_10565	96.8	222
group_10566	93.2	444
group_10570	93.1	504
group_10571	99.1	222
group_10575	91.2	441
group_10578	90.9	1068
group_10579	91.3	1125
group_10581	92.8	222
group_10582	98	249
group_10585	96.5	540
group_10592	96.6	588
group_10594	92.9	438
group_10598	90.4	933
group_10599	88.5	759
group_10605	99.6	228
group_10606	94.5	840
group_10621	90.9	822
group_10623	94.6	411
group_10627	92.5	975
group_10640	93.1	291
group_10647	97.9	237
group_10649	95.5	264
group_10657	94	714
group_10662	93.1	204
group_10669	92.9	2532
group_1068	89.6	231
group_10695	94.4	216
group_1070	90.5	396
group_10706	95.6	249
group_10708	90.5	924
group_10711	96.7	213
group_10714	94.6	426
group_10718	97.1	207
group_1072	87.2	507
group_10722	92.4	423
group_10725	92.7	1077
group_10727	93.9	885
group_10728	97.1	240
group_1073	89	390
group_10731	97	432
group_10743	96	321
group_10747	95	912
group_1075	86.4	570
group_10757	89.4	1476
group_10758	94	537
group_10759	91.8	306
group_1076	90.2	735
group_10761	91.1	1320
group_10762	91.6	699
group_10767	93.3	465
group_10770	90.9	717
group_10772	91.7	327
group_10773	90.2	1170
group_10774	91.6	549
group_10776	95.6	318
group_10784	90.1	2940
group_10790	92.6	954
group_10794	90.5	1296
group_10796	89.2	1335
group_10797	90.7	1341
group_10799	90.9	1131
group_10802	88.1	327
group_10805	97.4	351
group_10806	94.2	363
group_10811	92.3	963
group_10816	94	315
group_10818	91.8	1371
group_10819	95.8	360
group_10820	98.2	168
group_10834	90.6	585
group_10835	97.3	336
group_10838	92.8	483
group_10839	95.3	192
group_1084	91.9	270
group_10849	95.6	549
group_10850	91.6	573
group_10854	93.3	771
group_10857	96.7	183
group_10860	92.7	600
group_10865	95.1	588
group_10873	91.8	1176
group_10878	97.5	162
group_10886	95.9	537
group_10889	93.6	483
group_10892	97.3	333
group_10894	92.3	312
group_10897	88.8	921
group_10898	90.7	723
group_10903	93.9	165
group_10904	92.2	513
group_10905	94	753
group_1091	89	483
group_10911	96.7	180
group_10916	92.8	594
group_10924	90.4	480
group_10925	97.1	171
group_10929	92.4	540
group_10934	87	774
group_1095	90.5	315
group_1096	90.5	684
group_1103	87.1	348
group_1105	86.5	561
group_1144	88.6	597
group_1148	87.5	765
group_1149	84.7	1002
group_122	87.8	1455
group_124	82.2	129
group_1249	89.5	655
group_1250	89.1	762
group_1253	91.3	231
group_1254	87.6	873
group_1262	89.2	1296
group_1270	92.4	144
group_1272	88.6	1701
group_1275	88.9	729
group_1276	88.7	549
group_1283	88.6	864
group_1287	89.3	1053
group_1292	89.6	1182
group_1293	89.6	1479
group_1311	86.3	987
group_1313	89.3	234
group_1317	88.3	537
group_1330	90.1	372
group_1338	87.5	1599
group_1341	90.5	126
group_1343	91.8	195
group_1346	90.5	993
group_1349	89.5	507
group_1362	84.4	633
group_1375	89.2	315
group_1377	88.9	1431
group_1387	85.5	1203
group_1394	90.1	1047
group_1398	87.2	924
group_1402	90.1	513
group_143	86.2	333
group_1546	91.7	939
group_1548	85.7	897
group_1549	84.8	612
group_1551	89.8	537
group_1553	96.5	285
group_157	84.2	1593
group_1570	85.1	549
group_1573	86.8	462
group_1574	87.6	627
group_1583	89.6	759
group_1585	92.8	276
group_1594	88.6	735
group_1604	90.4	471
group_1605	92.1	252
group_1606	91.7	930
group_1633	85.7	957
group_1634	90.2	357
group_1645	90.2	315
group_1653	93.5	795
group_1656	90.2	621
group_1658	92.6	1659
group_1665	93.6	279
group_1668	91.4	579
group_1669	85.9	822
group_1691	92.6	552
group_1692	88.8	633
group_1693	92.7	156
group_1699	88.7	1371
group_1718	89.6	840
group_1719	88.6	456
group_1726	84.9	444
group_1727	89.7	690
group_1735	89.8	1116
group_1741	89.5	564
group_1743	89.5	258
group_1756	92	327
group_1757	89.1	396
group_176	84.9	504
group_1761	87.2	243
group_1792	89.5	927
group_1976	91.1	327
group_2000	90	1245
group_2001	89.2	240
group_2006	88.7	453
group_2013	87.3	465
group_2018	93.1	231
group_2021	88.3	771
group_2027	91.1	459
group_2028	92	456
group_2046	91.1	1197
group_2047	91.9	432
group_2063	94.9	429
group_2068	84.8	840
group_2069	88.2	1038
group_2071	90.7	777
group_2076	93.8	183
group_2078	89.6	366
group_2079	91.7	204
group_2080	94.6	438
group_2083	89.1	855
group_2084	88.8	1065
group_2085	90.8	1110
group_2086	88.7	1515
group_2088	86.9	1098
group_2101	94	318
group_2102	93.4	213
group_2103	92.2	915
group_2106	90.4	516
group_2108	92.1	849
group_211	82.7	588
group_2115	87.3	1182
group_2129	87.8	630
group_2131	90.3	1143
group_2144	89.2	780
group_2147	91.6	789
group_2154	92.5	321
group_2162	92.6	447
group_2163	88.7	1617
group_2165	94.9	297
group_2166	91.5	1275
group_2169	94	285
group_2170	95.3	1287
group_2186	89.2	1128
group_2187	88.8	846
group_2188	94.6	204
group_2196	90.9	750
group_2215	90.8	261
group_2220	92.9	1320
group_2222	93.4	273
group_2226	94.8	249
group_2228	91.7	612
group_2229	91.7	483
group_223	84.5	576
group_2230	91.5	1068
group_2252	89.3	369
group_2256	95.2	460
group_2259	89	1221
group_226	84.5	2550
group_2269	91.1	303
group_2272	90.4	312
group_2273	89.2	1261
group_2274	91.1	1419
group_2279	93.1	1200
group_2283	86.7	630
group_2284	92.6	358
group_2290	93.7	462
group_2297	90.2	1253
group_2302	90.8	504
group_2308	90	633
group_2313	92.4	393
group_2324	92.4	726
group_2327	90.2	573
group_2330	89.4	843
group_2332	88.2	1428
group_2333	94.6	204
group_2335	91.7	303
group_2338	93.1	204
group_2340	91.3	414
group_2347	91.6	594
group_2353	88.6	501
group_2354	88.9	1846
group_2356	95.4	219
group_2360	93.4	640
group_2365	90.3	360
group_2366	91.9	210
group_2382	89.6	1257
group_262	83.9	1041
group_263	85.9	943
group_2640	90.5	1380
group_2778	89.8	987
group_2779	91.3	906
group_2780	92.6	1437
group_2784	91.9	909
group_279	86	993
group_2812	92.2	516
group_2815	94.6	798
group_2818	91	822
group_2819	93	657
group_2822	87.9	1116
group_2830	92.4	525
group_2832	93	543
group_2838	93.7	1302
group_2852	92.3	1500
group_2857	91.5	471
group_2867	90.2	225
group_2874	87.1	972
group_2875	88.4	303
group_2879	91.7	831
group_2882	92.2	1218
group_2885	91.6	567
group_2887	90.3	723
group_2888	89.9	1230
group_2892	91.8	936
group_2897	87.9	315
group_2901	91.8	552
group_2915	90.5	420
group_2919	90.6	762
group_2920	95.6	294
group_2921	92.8	837
group_2923	92.6	348
group_2924	89.4	669
group_2928	97.2	399
group_2929	89.4	417
group_2931	93.3	522
group_2932	94	888
group_2933	96.2	234
group_2935	91.6	867
group_2937	90.4	270
group_2939	96.4	1215
group_2940	97.1	207
group_2955	91.6	1044
group_2958	90.2	975
group_2960	90.8	303
group_2989	95.1	528
group_2991	94.9	336
group_3002	94.9	678
group_3003	91.7	774
group_3006	92.8	816
group_3008	94.1	1674
group_3029	92.8	531
group_3034	88.9	1656
group_3037	93.3	813
group_3040	92.9	507
group_3042	95.4	216
group_3057	90.4	1212
group_3058	90.1	282
group_3060	88.8	906
group_3069	92.1	780
group_3076	94.1	186
group_3078	94.1	372
group_3082	93	528
group_3093	86.3	861
group_3112	90.4	1653
group_3113	92.6	216
group_3115	96.5	141
group_3120	91.8	390
group_3123	91	786
group_3127	89.3	834
group_3132	95.5	825
group_3135	90.6	1017
group_3137	94.2	879
group_3138	95.1	570
group_3143	91.5	552
group_3144	91.3	945
group_3146	89.3	1056
group_3148	91.4	1275
group_3154	90.2	930
group_3160	90.7	2292
group_3165	92.2	642
group_3169	95.7	138
group_3170	88.6	975
group_3174	94.3	717
group_3180	93.4	213
group_3182	87.7	879
group_3186	94.1	438
group_3190	89.7	504
group_3197	92.3	1254
group_3199	93.3	315
group_320	81.6	621
group_3203	94.2	156
group_3208	89.5	1203
group_3226	93.4	318
group_3227	94.8	210
group_3232	97.1	210
group_3235	87.8	534
group_3244	88.9	1437
group_3249	89.7	750
group_3257	95.4	153
group_3258	87.7	1188
group_3260	90.3	651
group_3275	94.6	546
group_3339	91.9	960
group_3353	92.9	1032
group_3388	89.9	1803
group_3510	89	1695
group_3513	93.9	510
group_3663	91.7	462
group_3677	89.8	852
group_374	87.8	246
group_388	88.1	447
group_391	87.3	540
group_395	81.8	1020
group_401	85.5	366
group_420	87	438
group_421	84.7	777
group_441	87.3	532
group_504	86	539
group_505	87	630
group_506	89.8	441
group_510	84.8	921
group_513	88.5	564
group_536	83.9	576
group_551	87.8	378
group_560	85.4	756
group_575	78.4	360
group_641	90.4	747
group_654	89.3	438
group_655	89.6	144
group_680	86.1	1146
group_686	88.1	810
group_702	87.3	563
group_704	85.6	957
group_708	84.8	741
group_721	88	750
group_791	85.4	1572
group_792	89.1	1670
group_795	87.5	600
group_816	87.4	792
group_819	86.8	705
group_823	85.8	2601
group_824	87.5	1206
group_828	88	1422
group_840	87.8	897
group_851	91.3	204
group_854	85.6	1350
group_859	87.7	759
group_863	87.7	705
group_868	87.4	531
group_875	83.3	510
group_884	86.2	384
group_885	86.5	555
group_911	85.8	798
group_913	91.4	567
group_984	90.2	336
group_985	90.2	348
group_998	86.4	1518
gspE	84.1	903
guaA	92.6	1545
guaB	94.7	1470
guaC	93.9	984
gyrA	93.8	2601
gyrB	95.2	1923
hchA	93.2	660
hddA	92.4	924
hemA	91.7	1353
hemB	92.2	984
hemC	91.2	924
hemE	93.6	1053
hemH	92.7	921
hemL1	88.8	1290
hemL2	91.3	1287
hemN	89.4	1119
hemY	88.8	1395
hepT	90.2	963
hexs_a	95.8	471
hflX	89	1239
hfq	93.1	231
hisA	87.9	705
hisB	90.5	579
hisC_1	88.8	1011
hisC_2	92.7	1068
hisD	88.4	1257
hisE	90	633
hisG	91.3	618
hisH1	90.4	582
hisS	90	1266
hmp	91.2	1158
hmuU	89.6	981
hom	92.8	1278
hpr	93	546
hprK	90.9	933
hpr_2	91.3	447
hpt	93.9	537
hpxO	90.2	1137
hrcA	95	975
hslO	90.4	879
hslR	94.4	267
hslU	93.2	1404
hslV	95.2	543
hsrA	88.6	1431
hssS	86.4	1392
htrB	91.2	1257
hup	99.6	273
hutG	91.9	990
hutH	86.3	1485
hutI	88.4	1242
hutP	90.6	438
hutU	91.9	1668
hxlR	90.4	354
iadA	85	1146
icd	94.4	1269
ideR	93.9	658
ileS	93.8	2751
ilvA	93	1266
ilvB	90.8	1734
ilvC	93.9	1008
ilvD	93.5	1689
ilvE_2	86	1059
ilvH	94.1	474
immR_2	87.6	363
ina	89.4	2355
infA	100	219
infB	95	2136
infC	96.6	531
iolE_1	92	969
ipdC	90.4	1644
isaB	88.5	513
isaB_2	90.2	552
iscS_1	88.8	1266
iscS_2	90.2	1149
isdG_1	90.3	321
isdG_2	91.1	327
ispD	88.1	687
ispE	92.2	849
ispF	94.8	480
ispG	89.1	1119
ispH	88.2	969
kapB	88.6	378
katA	95.5	1473
kdgA	89.4	633
kdgK_1	88.6	945
kdgK_2	87.8	954
kdgR	91.8	753
kefC	90.9	1842
kinD	84.1	1473
kipA_1	88.5	1005
kipA_2	81.2	1008
kipI_1	91.5	783
kipI_2	84.8	726
korA	92.7	1758
korB	93.5	867
ktrA	92.6	663
ktrB_2	87.6	1353
kynA	92.6	843
kynB	91.5	621
kynB_1	93.3	744
kynU	89.5	1284
lacA	84.7	432
lacC_1	90.5	912
lcfB	91.1	1500
lctP	90.5	1632
ldh	90	1101
ldhA	90.6	954
ldhD	87.6	1029
lepA	92	1824
leuA	92.3	1533
leuB	92.2	1041
leuC	94.3	1374
leuD	91.2	570
lexA	93.9	621
lgrD	89.2	1041
lgt	91.8	819
liaR	91.6	630
liaS	91.4	1110
licB_1	91.1	303
licC_2	90.7	1299
licH	85.6	1407
ligA	90.6	2026
limB_1	85.3	1008
limB_2	89.7	1053
lipA	95.9	918
lipL	93.9	771
lplJ	92.2	996
lptB	93	900
lrgA	91.6	417
lrgB	91.6	702
lspA	95.8	480
ltaA	89.6	1197
ltaS	93.7	1941
lutA	88.5	1257
lutR_1	93.9	712
lutR_2	91.4	642
lutR_3	92.4	684
luxA	89.2	1011
luxS	93.6	468
lysA	88.6	1266
lysP_1	92	1494
lysP_2	91.9	1443
lysS	93.8	1488
lytC	92.2	887
lytN	89.9	624
lytR_3	90.7	963
maa_1	93.4	483
malF	93.1	1263
malG	91.2	843
malH	87.1	1326
malL	88.2	1659
malP	90.8	1578
malR	91.2	1005
manP_2	89.7	1962
map	93.3	756
mazE	96.4	168
mazF	94.9	373
mazG	89.5	1167
mccF	87.8	1038
mce2R	96.3	456
mdeA	88.5	1284
mdh	91.1	933
mdtA	85.5	1092
mecA	96.4	690
menA	91.7	939
menB	94.5	819
menD	90	1680
metC	93.5	1173
metE	93.4	2247
metG	94.9	2001
metI_1	91.7	1107
metI_2	90.9	672
metK	93.3	1194
metN2_1	91.4	723
metN2_2	92.6	1026
metP	94.4	696
metQ_1	90.1	808
metQ_4	94.2	822
metX	90.2	972
mfd_2	89.8	3510
mgrA	97.1	447
mgsR	96.6	354
mgt	92.5	816
mgtE	94.1	1383
mhqA_2	90.2	933
mhqA_3	89.7	966
mhqA_4	90.9	816
mhqD_2	88.3	591
mhqR	93.3	432
minD	91.3	1062
mleN_1	89.6	1401
mleN_2	85.6	1515
mnaA	94.5	1137
mnhA1	92	2412
mnhB1	93.9	429
mnhC1_1	94.2	348
mnhC1_2	94.7	342
mnhD1	89.9	1491
mnhE1	91.9	483
mnhF1	92.4	291
mnhG1	93	342
mnmA	90.3	1110
mnmE	93.5	1380
mnmG	93.8	1875
mntB	90.9	825
moaC	92.7	480
moaD	95.3	234
moaE	90.2	450
mobA	92.9	591
mobB	88.2	459
modA	94	768
modB	86.4	669
moeA	84.7	1260
moeB_1	81.5	999
moeB_2	92.1	1002
mprA	92.1	396
mqo2	94.4	1485
mraY	92	966
mreC	93.6	858
mreD	87.9	504
mrnC	93.7	411
mrpA	92	2400
mrpB	93.9	426
mrpD	90.5	1503
mrpE	91.9	483
mrpF	93.2	294
mrpG	94.7	498
mscL	95.6	360
mshB	95.2	669
mshD	83.6	555
msrA1	93.9	456
mta	88	759
mtaB	92.4	1347
mtcA1	88.2	570
mtlA	96.6	1512
mtlD	91.2	1119
mtlF	94.5	435
mtlR_1	93.3	2043
mtrR	90.2	642
murA2	91.2	1257
murAA	93	1296
murB	93.4	918
murC	92.6	1314
murE_2	90.4	1485
murF	90	1350
murI_2	92.4	798
murR	89.7	807
mutL	86.7	1980
mutS	90.9	2526
mutS2	91.4	2349
mvaA	85.4	1278
nadA	85.5	1101
nadB	84.3	1599
nadC	87.5	834
nadD	91.4	573
nadE	88.8	822
nagA_1	89.7	1218
nagA_2	88.2	1152
nagB	89.3	741
nanA	92	870
nanE	90.1	669
narG	91.2	3672
narT	90.4	1161
narW	87.7	576
narX	90.6	681
nfdA	87.5	1590
nfo	92	891
nfrA	90.5	756
nhaC_1	87.7	1428
nhaC_2	89.2	1305
nhaK	91.3	2043
nhaX	88.9	414
niaR	88.2	519
nifU	96.1	441
nirQ	90.4	798
nnrD	93.6	810
noc	93.3	840
norG	84.6	1440
nos	89.2	1059
nrdE2	94	2106
nrdF	94.5	972
nreC	91.1	654
nrgA	91.1	1236
nrnA_1	92.3	1965
nrnA_2	86.8	927
nsrR	91.6	429
ntaA	86.8	1308
nth	89.1	669
nudF	85.8	564
nuoL	87.6	1530
nupC	96.2	1254
oatA_2	88	2007
obg	90.6	1293
odh	89.4	1155
odhA	93.5	2829
odhB	94	1281
ohrR	87.9	438
opcR	94.8	555
oppA_2	90.1	1671
oppB	94.4	927
oppC_2	91.5	1071
oppD	92.3	1074
opuBB	91.7	1515
opuCA_1	90.2	963
opuCA_2	90.8	1158
opuCB	94	636
opuCC_1	87.6	1023
opuCC_2	91.4	954
opuCD	91	690
opuD_1	91.6	1623
oxyR	91.1	876
pabA	84.7	603
pabB_2	85.9	1404
paiA_1	95	477
panB	88.2	807
panC	83.6	843
panD	88.5	384
panE	82.8	849
parE	92	2028
patA_1	91.3	1284
patA_2	87.7	1158
patA_3	89	1221
patB_1	89.1	1200
pbp	84.7	2001
pbpB	90.9	2292
pbpF	93.2	2460
pbpH	90.2	2043
pbuE	88.7	1158
pbuG	93.7	1335
pchA	92.4	1335
pcrA	91.3	2181
pcrB	92	684
pdhA	97.2	1113
pdhB	96.6	978
pdhC_1	96.8	1299
pdhD	95.5	1407
pdp	92.7	1302
pdxK	94.2	831
pdxS	94.5	888
pdxT	93.1	576
pepA_1	92	1077
pepA_2	87.3	1047
pepF1_1	91.9	1806
pepQ	88.6	1056
pepT_1	90.1	1227
pepT_2	91.1	1134
perR	96.7	453
petC	97.8	504
pfbA	89.3	1107
pgi	93.4	1338
pgk	94.7	1191
pgl	90.3	1035
pglI	88.2	2652
pgsA	95.9	582
pheA	88.9	813
pheS	94.1	1059
pheT_1	89.7	2406
phnR	91.3	714
phoP	94.5	711
phoR	89.8	1707
phoU	90.3	648
pimB	89.5	1122
pitA	93.9	999
pksG	91.4	1170
plsC_2	90.8	759
plsX	93.3	987
plsY	96.5	579
pncB2	92.2	1476
pnp	93.4	2163
polA	90.7	2622
polC_2	90.4	4320
polX	90.7	1704
ponA	90.4	2343
potA	91.7	1098
potB	90.3	804
potD	91.5	1074
ppaC	92.4	927
ppaX_1	94.1	765
ppaX_2	87.5	711
ppk	91.2	2166
ppnK_1	93.2	804
ppnK_2	89.8	804
ppx	90.5	1527
prfA	92.9	1077
prfB	93.5	993
prfC	90.7	1563
priA	88.8	2409
prkC	90.9	2028
prmA	93.2	933
prmC	85.8	855
proC	91.2	816
proP_1	91.8	1402
proS	90.9	1704
prs	96.5	1041
prsA	94	972
psaA	87.9	918
pspB_1	85.1	591
pstA	89.6	903
pstB3	89.3	840
pstC	89.4	930
pta_1	95.4	987
pth	93.4	573
ptpB	90.2	417
ptrA	87.6	1221
ptsG_1	92.9	1536
ptsG_2	89.5	1491
ptsH	98.5	267
ptsI	95.4	1713
pucK	91.3	1269
purA	94.6	1287
purB	93.1	1296
purC	88.3	702
purD	88.8	1254
purE	93	483
purF	88.5	1497
purH	89.3	1479
purL	90.2	2190
purM	88.6	1039
purN	91	567
purQ	92.7	672
purR	95	825
purT	87.4	1194
purU	89.4	843
putP_2	93.7	1575
puuR	95.2	543
pyk	92.6	1761
pyrB	93.1	903
pyrC	91.1	1313
pyrD	88.9	927
pyrE	90	609
pyrF	90.6	693
pyrG	93.7	1602
pyrH	97.1	723
pyrK	92.4	759
pyrP	92.3	1302
pyrR	92.4	528
qacA_1	86	1491
qcrB	98.7	675
qoxA	92.1	1107
qoxB	94.3	1995
qoxC	94.3	609
qoxD	96.9	294
queA	88.4	1026
queC	92.1	669
queD	88.4	432
queE_1	91.7	1128
queE_2	90.7	711
queF	91.2	501
queG	93.5	1128
rarA	87.3	1263
rbfA	95.4	345
rbgA	91.3	885
rbsA	90.6	1497
rbsB	93.6	915
rbsC	93.3	939
rbsD	90.3	391
rbsK	88.5	882
rbsR	91.5	966
rebM	75.9	773
recD2	88.8	2400
recF	95	1116
recG	89.2	2040
recJ	88.5	2295
recN	90.4	1677
recO	89.5	753
recQ_2	86.3	1377
recR	95.2	600
recU	93.3	627
recX	94.3	804
resA_1	92.9	576
rex	97.2	633
rhtB	88.7	636
ribBA	89.7	1173
ribE	92.3	633
ribF	93.4	957
ribH	92.1	471
ribU	92.5	549
rihB_2	90.4	933
rihC	83.9	918
rimL_1	87.3	693
rimM	91.8	501
rimP	97.6	468
rlmCD	92.3	1362
rlmH	85.6	480
rlmI	91.6	1173
rlmL	91.4	1125
rlmN	94.1	1092
rluB	89.4	738
rluD_2	92.4	924
rluD_3	90.6	822
rluF	91.1	723
rmpB	85.4	540
rnc	95	720
rnhA	86.8	417
rnhB	87	777
rnhC	90.1	941
rnmV_1	94.5	543
rnmV_2	94.8	405
rnpA	97.4	345
rnr	92.3	2370
rny	97.4	1560
rnz	88.6	918
rocA	92.5	1551
rocA1	94.1	1545
rocD2_1	91.7	1206
rocD2_2	95.1	1191
rodA	91.2	1200
rot	90.2	408
rot_2	90.6	360
rpe	88.6	648
rpiA	82.7	681
rplA	98.4	693
rplB	97.1	834
rplC	96.7	663
rplD	97.6	624
rplE	99.6	540
rplF	96.8	537
rplGA	97.9	327
rplGB	96.5	255
rplI	94.6	447
rplJ	98.4	507
rplK	99.1	423
rplL	98.6	363
rplM	98.2	438
rplN	97.8	369
rplO	97.7	441
rplP	98.6	435
rplQ	99.2	366
rplR	97.5	363
rplS	98.6	351
rplT	98.1	360
rplU	98.7	309
rplV	97.8	357
rplW	97.8	279
rplX	97.2	321
rplY	95.6	654
rpmA	99.6	285
rpmB	98.9	189
rpmC	99.1	216
rpmD	98.9	180
rpmE2	99.2	255
rpmF	98.3	174
rpmG2_1	100	150
rpmH	97.8	138
rpmI	98.5	201
rpoA	98.1	959
rpoB	96.7	3555
rpoC	96.2	3618
rpoE	95.3	516
rpoZ	94.5	201
rpsA_1	89.7	2154
rpsA_2	93.2	1158
rpsB	98.3	777
rpsC	98.5	654
rpsD	96.2	603
rpsE	97.6	501
rpsF	99.3	294
rpsG	98.9	471
rpsH	98.7	399
rpsI	99.5	393
rpsJ	99	309
rpsK	98.7	390
rpsL	98.8	423
rpsM	97.3	366
rpsN1	98.9	186
rpsN2	93	270
rpsO	99.3	270
rpsP	98.6	276
rpsQ	98.9	264
rpsR	97.9	243
rpsS	99.3	279
rpsT	97.2	252
rpsU	98.3	177
rsbU	91.1	1005
rsbV	96.3	324
rsbW	96.2	477
rsfS	89.5	354
rsgA_2	87.9	879
rsmA	92.7	891
rsmB	91.8	1311
rsmC	91.3	609
rsmD	93	555
rsmE	94	750
rsmG	92.1	720
rsmH	95.5	936
rsmH_2	87.6	597
rsmI	88.8	843
rssA	94.3	900
rsuA	86.9	711
ruvA	91.7	591
ruvB	89.8	996
sarA	95.4	369
sarR	88.4	357
sarV	90.9	330
sat	91.2	1179
sbcD	85.4	1128
scpA	93.6	735
scpB	91.3	561
scrB	88.9	1482
sdcS_2	87.5	1596
sdhA	90.5	870
sdhB	92.9	666
sdhC	95.8	612
sepA_1	93.2	468
sepA_2	91	1548
sepF	93.8	585
serA	92.4	1602
serS	91.9	1287
setC	92.2	1212
siaP	87.7	1002
siaT	89.3	1296
sigA	94.2	1110
sigB	94.4	772
sigH	88.9	618
sirB_2	90.3	741
sle1_1	91.4	1029
sle1_2	94.6	813
smc	91.3	3567
smc_1	84.5	3033
smpB	95.5	462
sodA	96.2	603
speA	87.5	1350
speG_1	87.6	501
spo0A	90.2	706
spo0C	90.2	837
spo0M	92.1	405
spoVG	95.8	333
sppA	91.7	996
spsB_1	87.6	588
spsB_2	90.7	567
spxA	98.5	396
srlR_1	91.9	780
srrA	94.6	708
srrB	87.8	1743
ssaA2	90.6	534
ssaA_2	92.3	561
ssb_1	98.1	528
sspA_2	90.1	735
stp	93.3	744
sucC	96.7	1167
sufB_1	95.4	1398
sufB_2	94.8	1317
suhB	92.8	822
sumT	92.4	756
swrC	91.1	3174
tadA	90.9	483
tagA	90.9	849
tagH_1	91.3	1548
tagH_2	89.2	918
tagO	92.9	1056
tal	92.5	711
tatC2	92.4	783
tcdA	93	771
tcyB	93.5	720
tcyC	93.1	729
tcyJ	90	828
tcyL	89.5	696
tcyM	87.5	705
tcyP	92.2	1392
tdk	94.3	600
tenA	85.7	693
tesE	90.9	762
tetD	93.4	861
tgt	96.1	1140
thiD	88.4	813
thiE	86.6	654
thiG	87.2	768
thiI	88.7	1218
thiM	86.1	792
thiN	87.8	645
thiO	85.4	1110
thiS	89.1	201
thlA	86	1158
thrB	89.4	912
thrS	89.9	1973
thyA	90.9	954
tig	96.5	1281
tilS	90.1	1281
tkt	92.1	1989
tmk	93.2	621
tmk_1	88.3	1438
topA	94.9	2141
tpiA	96.6	762
tpx	95	501
tqsA_1	89.7	1113
tqsA_2	86.5	1047
tqsA_3	91.5	1206
treA	91.4	1644
treB	89.3	1461
treR	89.6	729
trmB	95.8	636
trmD	91.4	723
trmFO	91.6	1305
trmK	89.6	666
trpB	88.8	1227
trpC	87.2	795
trpD2	89.2	1017
trpF	85.8	618
trpG	88.1	597
trpS	93	996
truA	91.3	804
truB	90.9	912
trxA_1	97.1	315
trxA_2	93.8	324
trxB_1	95.1	948
tsaB	87.4	669
tsaD	89.6	1014
tsaE	92	462
tuf	98.9	1191
typA	95.2	1848
tyrS	91.1	1263
ugpC	90.2	1101
ugpQ_1	88.6	744
ugtP	90.4	1176
ung	91.9	657
upp	97.3	630
uppP_1	93.4	846
uppP_2	92	822
uppS	94.2	753
uup	92	1872
uvrA	91.4	2835
uvrB	92.8	1983
uvrC	89.7	1782
uxuA	91.4	1083
uxuB	90.2	834
valS	93	2631
vanY	89.7	699
vraR	93.8	630
vraS	93.4	1044
walK	91.8	1842
walR	95.6	702
wbpA	93.3	1284
xerC	93.2	915
xerD_2	89.1	915
xpt	94.1	576
xseA	91	1344
xylB	91	1536
yabJ	94.7	378
ybaK	93	483
ybaN	94.4	375
ybbH_1	89.3	852
ybeY	96.5	462
ybeZ	90.7	948
ybhF	85.6	723
ybhR	87.3	1134
ycaD	89.8	1170
yccS	89.5	1884
ycfH	93.3	765
ycgJ	84.5	780
ychF	93.9	1101
yciC_2	88.8	1203
ycjS_1	91.3	1077
ycjS_2	91	1041
yclM	88.1	1374
yclQ_1	93	1038
ycnE	90.6	288
ydaD_2	82.3	765
ydaF_2	88.1	540
ydbM	89	1170
ydbP	93.8	321
ydcV	89.1	813
ydfH_1	89.5	708
ydfH_2	90.4	603
ydfJ	88	2430
ydhF	91.9	909
ydhP_1	88.6	1191
ydhP_2	90.2	1167
ydjA	88	540
ydjM	91.1	492
ydjP_2	89.2	780
yfbR	95.5	651
yfhQ	88.5	1032
yfiC	89.8	729
yfkN_1	89.4	1333
yfkN_2	88.8	1512
yfmJ	90.9	1002
ygaZ	88.9	711
yhaM	92.6	942
yhaO	92.7	1185
yhbU_1	91.2	924
yhbU_2	92	1269
yhbY	93.8	291
yhdG_2	90.9	1392
yhdG_3	90	1380
yheH_1	89.3	1764
yheH_2	87.2	1749
yheI_2	89.3	1726
yheS_1	88.8	1923
yheS_3	94.4	1602
yhfK	92.9	648
yhfS	83.5	1152
yhjX	88.6	1239
yiaM	84.9	489
yicI	87.8	2094
yicL_1	88.6	939
yidA	92.7	813
yidC	96.1	870
yidD	85.8	225
yifK_2	93.6	1383
yigZ	90.6	651
yitJ	92.3	1839
yjbI	93.6	360
yjbM	95	636
yjcF	88.2	423
yjiY	89.2	1446
yjjP_1	93.5	768
yjlD	93.1	1065
ykfA	87.3	924
ykfB	89.6	1101
ykfC	89.1	909
ykkC	91	324
ykkD	89.8	315
ykoC	87.5	792
ykoD_2	89.3	1404
ykoE	91.8	576
ykuT	92.2	885
ylmA	88.6	800
yodB	97	330
yodC_1	92.7	660
yodC_2	93.4	603
ypcP	86.1	885
ypdA	90	1755
yqfL	93	816
yqjA_1	93.9	609
yqjA_2	86.1	618
yraA	97.3	516
yrrB	86.1	669
yrrK	95.6	438
ysdC	91.5	1077
ytcD	92.5	372
yteT	85.5	1266
ytgP_1	88.5	1509
ytgP_2	90.3	1635
ythA	93	1347
ythB	91.9	1017
ytkD_1	84.3	402
ytkD_2	90.5	465
ytnP	90.5	843
ytpA_1	91.6	819
ytpA_2	85.3	948
ytpP	92.4	315
ytrA	95.2	378
ytrB_1	88.5	876
yugI_1	99.5	384
yugI_2	97.6	381
yusO	91	435
yusV_2	93.2	804
yusV_3	93.5	801
yutF	91	768
yvaA	90.5	975
yvbK	86.2	450
yvgN_1	90.2	828
yvgN_2	90.3	843
yvyD	96	573
ywaC	91.9	741
ywiB	95.7	417
ywlC	88.3	1047
ywlF	96.1	438
ywnA	89.1	414
ywpJ	93.8	870
ywpJ_2	86.1	807
ywqE	88.4	717
yxeO_2	89.9	744
yxeP_2	90.2	1200
yxeP_3	90.3	1176
yxeP_4	91.4	1206
yxeP_7	88	1149
yxlF_1	87.2	873
yxlF_2	86.7	669
yycB_1	91.1	1215
yycB_2	87.2	1191
yycH	90.7	1335
yycI	87.9	792
yycJ	92.7	792
yydK	89	702
zapA	98.5	273
znuB	89.5	882
znuC_1	91	714
zupT	88.4	816
zur	90.3	414
zwf	93.2	1485
